# Supplementary material for: Utilization of potentially inappropriate medication and risk of adverse drug events among older adults with chronic renal insufficiency: a population-wide cohort study
Source: PubMed Central journal article supplement (PMC7877037; doi:10.1186/s12877-021-02057-5), 2021-02-10
Supplement: 12877_2021_2057_MOESM1_ESM.pdf [file 12877_2021_2057_MOESM1_ESM.pdf]

# Utilization of potentially inappropriate medication and risk of adverse drug events among older adults with chronic renal insufficiency: a population-wide cohort study

Safoura Sheikh Rezaei, Hana Šinkovec, Alexander Schöberl, Christoph Rinner, Georg Heinze, Michael Wolzt, Walter Gall

## Supplementary material

List of adverse drug events

List describing ICD10 codes indicating possible clinically relevant adverse drug events (ADE), sorted by categories defined in Stausberg and Hasford (2010) (A.1: a drug-related causation was noted in the ICD10; A.2: a drug- or other substance-related causation was noted in the ICD10; B.1: the event was denoted as a drug poisoning, thus implying an unphysiological dosage; B.2: the event was denoted as poisoning by or harmful use of drugs or other substances; C: a drug related causation was very likely; D: a drug-related causation was likely; E: a drug-related causation was possible). Codes within each category sorted by alphabetical order.

| Category | ICD10  | Description                                                                         |
|----------|--------|-------------------------------------------------------------------------------------|
| A.1      | D52.1  | Drug-induced folate deficiency anaemia                                              |
| A.1      | D59.0  | Drug-induced autoimmune haemolytic anaemia                                          |
| A.1      | D59.2  | Drug-induced nonautoimmune haemolytic anaemia                                       |
| A.1      | D61.1  | Transient acquired pure red cell aplasia/Other aplastic anaemias                    |
| A.1      | D61.10 | Transient acquired pure red cell aplasia                                            |
| A.1      | D61.18 | Other aplastic anaemias                                                             |
| A.1      | D61.19 | Other aplastic anaemias, not specified                                              |
| A.1      | D69.52 | Heparin induced thrombocytopenia Type I                                             |
| A.1      | D69.53 | Heparin induced thrombocytopenia Type II                                            |
| A.1      | D70.1  | Drug-induced agranulocytosis and neutropenia                                        |
| A.1      | D70.10 | Drug-induced agranulocytosis and neutropenia; critical phase <4 days                |
| A.1      | D70.11 | Drug-induced agranulocytosis and neutropenia; critical phase between 10 and 20 days |
| A.1      | D70.12 | Drug-induced agranulocytosis and neutropenia; critical phase >20 days               |
| A.1      | D70.18 | Other disorders of agranulocytosis and neutropenia                                  |
| A.1      | D70.19 | Drug-induced agranulocytosis and neutropenia, unspecified                           |
| A.1      | E06.4  | Drug-induced thyroiditis                                                            |
| A.1      | E16.0  | Drug-induced hypoglycaemia without coma                                             |
| A.1      | E23.1  | Drug-induced hypopituitarism                                                        |
| A.1      | E24.2  | Drug-induced Cushing syndrome                                                       |
| A.1      | E27.3  | Drug-induced adrenocortical insufficiency                                           |
| A.1      | E66.1  | Drug-induced obesity                                                                |
| A.1      | E66.10 | Drug-induced obesity: Body-Mass-Index [BMI] between 30 and 35                       |
| A.1      | E66.11 | Drug-induced obesity: Body-Mass-Index [BMI] between 35 and 40                       |
| A.1      | E66.12 | Drug-induced obesity: Body-Mass-Index [BMI] between 40 and 55                       |
| A.1      | E66.19 | Drug-induced obesity: Body-Mass-Index [BMI] unspecified                             |
| A.1      | G21.0  | Malignant neuroleptic syndrome                                                      |
| A.1      | G21.1  | Other drug-induced secondary parkinsonism                                           |
| A.1      | G24.0  | Drug-induced dystonia                                                               |
| A.1      | G25.1  | Drug-induced tremor                                                                 |
| A.1      | G25.4  | Drug-induced chorea                                                                 |

|     |        |                                                                                   |
|-----|--------|-----------------------------------------------------------------------------------|
| A.1 | G25.6  | Drug-induced tics and other tics of organic origin                                |
| A.1 | G44.4  | Drug-induced headache, not elsewhere classified                                   |
| A.1 | G62.0  | Drug-induced polyneuropathy                                                       |
| A.1 | G72.0  | Drug-induced myopathy                                                             |
| A.1 | H26.3  | Drug-induced cataract                                                             |
| A.1 | H40.6  | Glaucoma secondary to drugs                                                       |
| A.1 | I95.2  | Hypotension due to drugs                                                          |
| A.1 | J70.2  | Acute drug-induced interstitial lung disorders                                    |
| A.1 | J70.3  | Chronic drug-induced interstitial lung disorders                                  |
| A.1 | J70.4  | Drug-induced interstitial lung disorders, unspecified                             |
| A.1 | K85.3  | Drug-induced acute pancreatitis                                                   |
| A.1 | K85.30 | Drug-induced acute pancreatitis: without specifications on organ complication     |
| A.1 | K85.31 | Drug-induced acute pancreatitis: with organ complication                          |
| A.1 | L10.5  | Drug-induced pemphigus                                                            |
| A.1 | L43.2  | Lichenoid drug reaction                                                           |
| A.1 | L56.0  | Drug phototoxic response                                                          |
| A.1 | L56.1  | Drug photoallergic response                                                       |
| A.1 | L64.0  | Drug-induced androgenic alopecia                                                  |
| A.1 | M10.2  | Drug-induced gout                                                                 |
| A.1 | M10.20 | Drug-induced gout: multiple body regions                                          |
| A.1 | M10.21 | Drug-induced gout: shoulder region                                                |
| A.1 | M10.22 | Drug-induced gout: upper arm                                                      |
| A.1 | M10.23 | Drug-induced gout: forearm                                                        |
| A.1 | M10.24 | Drug-induced gout: hand                                                           |
| A.1 | M10.25 | Drug-induced gout: pelvic region and upper leg                                    |
| A.1 | M10.26 | Drug-induced gout: lower leg                                                      |
| A.1 | M10.27 | Drug-induced gout: ankle and foot                                                 |
| A.1 | M10.28 | Drug-induced gout: other regions                                                  |
| A.1 | M10.29 | Drug-induced gout: unspecified regions                                            |
| A.1 | M32.0  | Drug-induced systemic lupus erythematosus                                         |
| A.1 | M80.4  | Drug-induced osteoporosis with pathological fracture                              |
| A.1 | M80.40 | Drug-induced osteoporosis with pathological fracture: multiple body regions       |
| A.1 | M80.41 | Drug-induced osteoporosis with pathological fracture: shoulder region             |
| A.1 | M80.42 | Drug-induced osteoporosis with pathological fracture: upper arm                   |
| A.1 | M80.43 | Drug-induced osteoporosis with pathological fracture: forearm                     |
| A.1 | M80.44 | Drug-induced osteoporosis with pathological fracture: hand                        |
| A.1 | M80.45 | Drug-induced osteoporosis with pathological fracture: pelvic region and upper leg |
| A.1 | M80.46 | Drug-induced osteoporosis with pathological fracture: lower leg                   |
| A.1 | M80.47 | Drug-induced osteoporosis with pathological fracture: ankle and foot              |
| A.1 | M80.48 | Drug-induced osteoporosis with pathological fracture: other regions               |
| A.1 | M80.49 | Drug-induced osteoporosis with pathological fracture: unspecified regions         |
| A.1 | M81.4  | Drug-induced osteoporosis                                                         |
| A.1 | M81.40 | Drug-induced osteoporosis: multiple body regions                                  |
| A.1 | M81.41 | Drug-induced osteoporosis: shoulder region                                        |
| A.1 | M81.42 | Drug-induced osteoporosis: upper arm                                              |
| A.1 | M81.43 | Drug-induced osteoporosis: forearm                                                |
| A.1 | M81.44 | Drug-induced osteoporosis: hand                                                   |

|     |        |                                                                                                      |
|-----|--------|------------------------------------------------------------------------------------------------------|
| A.1 | M81.45 | Drug-induced osteoporosis: pelvic region and upper leg                                               |
| A.1 | M81.46 | Drug-induced osteoporosis: lower leg                                                                 |
| A.1 | M81.47 | Drug-induced osteoporosis: ankle and foot                                                            |
| A.1 | M81.48 | Drug-induced osteoporosis: other regions                                                             |
| A.1 | M81.49 | Drug-induced osteoporosis: unspecified regions                                                       |
| A.1 | M83.5  | Other drug-induced osteomalacia in adults                                                            |
| A.1 | M83.50 | Other drug-induced osteomalacia in adults: multiple regions                                          |
| A.1 | M83.51 | Other drug-induced osteomalacia in adults: shoulder regions                                          |
| A.1 | M83.52 | Other drug-induced osteomalacia in adults: upper arm                                                 |
| A.1 | M83.53 | Other drug-induced osteomalacia in adults: forearm                                                   |
| A.1 | M83.54 | Other drug-induced osteomalacia in adults: hand                                                      |
| A.1 | M83.55 | Other drug-induced osteomalacia in adults: pelvic region and upper leg                               |
| A.1 | M83.56 | Other drug-induced osteomalacia in adults: lower leg                                                 |
| A.1 | M83.57 | Other drug-induced osteomalacia in adults: ankle and foot                                            |
| A.1 | M83.58 | Other drug-induced osteomalacia in adults: other regions                                             |
| A.1 | M83.59 | Other drug-induced osteomalacia in adults: unspecified regions                                       |
| A.1 | M87.1  | Osteonecrosis due to drugs                                                                           |
| A.1 | M87.10 | Osteonecrosis due to drugs: multiple regions                                                         |
| A.1 | M87.11 | Osteonecrosis due to drugs: shoulder region                                                          |
| A.1 | M87.12 | Osteonecrosis due to drugs: upper arm                                                                |
| A.1 | M87.13 | Osteonecrosis due to drugs: forearm                                                                  |
| A.1 | M87.14 | Osteonecrosis due to drugs: hand                                                                     |
| A.1 | M87.15 | Osteonecrosis due to drugs: pelvic region and upper leg                                              |
| A.1 | M87.16 | Osteonecrosis due to drugs: lower leg                                                                |
| A.1 | M87.17 | Osteonecrosis due to drugs: ankle and foot                                                           |
| A.1 | M87.18 | Osteonecrosis due to drugs: other regions                                                            |
| A.1 | M87.19 | Osteonecrosis due to drugs: unspecified regions                                                      |
| A.1 | N14.0  | Analgesic nephropathy                                                                                |
| A.1 | O74.4  | Toxic reaction to local anaesthesia during labour and delivery                                       |
| A.1 | R50.2  | Drug-induced fever                                                                                   |
| A.1 | T88.3  | Malignant hyperthermia due to anaesthesia                                                            |
| A.2 | D64.2  | Secondary sideroblastic anaemia due to drugs and toxins                                              |
| A.2 | E03.2  | Hypothyroidism due to medicaments and other exogenous substances                                     |
| A.2 | F11    | Mental and behavioural disorders due to use of opioids                                               |
| A.2 | F11.0  | Mental and behavioural disorders due to use of opioids: acute intoxication                           |
| A.2 | F11.1  | Mental and behavioural disorders due to use of opioids: harmful use                                  |
| A.2 | F11.2  | Mental and behavioural disorders due to use of opioids: dependence syndrome                          |
| A.2 | F11.3  | Mental and behavioural disorders due to use of opioids: withdrawal state                             |
| A.2 | F11.4  | Mental and behavioural disorders due to use of opioids: withdrawal state with delirium               |
| A.2 | F11.5  | Mental and behavioural disorders due to use of opioids: psychotic disorder                           |
| A.2 | F11.6  | Mental and behavioural disorders due to use of opioids: amnesic syndrome                             |
| A.2 | F11.7  | Mental and behavioural disorders due to use of opioids: residual and late-onset psychotic disorder   |
| A.2 | F11.8  | Mental and behavioural disorders due to use of opioids: other mental and behavioural disorders       |
| A.2 | F11.9  | Mental and behavioural disorders due to use of opioids: unspecified mental and behavioural disorders |
| A.2 | F13    | Mental and behavioural disorders due to use of sedatives or hypnotics                                |
| A.2 | F13.0  | Mental and behavioural disorders due to use of sedatives or hypnotics: acute intoxication            |
| A.2 | F13.1  | Mental and behavioural disorders due to use of sedatives or hypnotics: harmful use                   |

|     |       |                                                                                                                                                  |
|-----|-------|--------------------------------------------------------------------------------------------------------------------------------------------------|
| A.2 | F13.2 | Mental and behavioural disorders due to use of sedatives or hypnotics: dependence syndrome                                                       |
| A.2 | F13.3 | Mental and behavioural disorders due to use of sedatives or hypnotics: withdrawal state                                                          |
| A.2 | F13.4 | Mental and behavioural disorders due to use of sedatives or hypnotics: withdrawal state with delirium                                            |
| A.2 | F13.5 | Mental and behavioural disorders due to use of sedatives or hypnotics: psychotic disorder                                                        |
| A.2 | F13.6 | Mental and behavioural disorders due to use of sedatives or hypnotics: amnesic syndrome                                                          |
| A.2 | F13.7 | Mental and behavioural disorders due to use of sedatives or hypnotics: residual and late-onset psychotic disorder                                |
| A.2 | F13.8 | Mental and behavioural disorders due to use of sedatives or hypnotics: other mental and behavioural disorders                                    |
| A.2 | F13.9 | Mental and behavioural disorders due to use of sedatives or hypnotics: unspecified mental and behavioural disorders                              |
| A.2 | F15   | Mental and behavioural disorders due to use of other stimulants, including caffeine                                                              |
| A.2 | F15.0 | Mental and behavioural disorders due to use of other stimulants, including caffeine: acute intoxication                                          |
| A.2 | F15.1 | Mental and behavioural disorders due to use of other stimulants, including caffeine: harmful use                                                 |
| A.2 | F15.2 | Mental and behavioural disorders due to use of other stimulants, including caffeine: dependence syndrome                                         |
| A.2 | F15.3 | Mental and behavioural disorders due to use of other stimulants, including caffeine: withdrawal state                                            |
| A.2 | F15.4 | Mental and behavioural disorders due to use of other stimulants, including caffeine: withdrawal state with delirium                              |
| A.2 | F15.5 | Mental and behavioural disorders due to use of other stimulants, including caffeine: psychotic disorder                                          |
| A.2 | F15.6 | Mental and behavioural disorders due to use of other stimulants, including caffeine: amnesic disorder                                            |
| A.2 | F15.7 | Mental and behavioural disorders due to use of other stimulants, including caffeine: residual and late-onset psychotic disorder                  |
| A.2 | F15.8 | Mental and behavioural disorders due to use of other stimulants, including caffeine: other mental and behavioural disorders                      |
| A.2 | F15.9 | Mental and behavioural disorders due to use of other stimulants, including caffeine: unspecified mental and behavioural disorders                |
| A.2 | F19   | Mental and behavioural disorders due to multiple drug use and use of other psychoactive substances                                               |
| A.2 | F19.0 | Mental and behavioural disorders due to multiple drug use and use of other psychoactive substances: acute intoxication                           |
| A.2 | F19.1 | Mental and behavioural disorders due to multiple drug use and use of other psychoactive substances: harmful use                                  |
| A.2 | F19.2 | Mental and behavioural disorders due to multiple drug use and use of other psychoactive substances: dependence syndrome                          |
| A.2 | F19.3 | Mental and behavioural disorders due to multiple drug use and use of other psychoactive substances: withdrawal state                             |
| A.2 | F19.4 | Mental and behavioural disorders due to multiple drug use and use of other psychoactive substances: withdrawal state with delirium               |
| A.2 | F19.5 | Mental and behavioural disorders due to multiple drug use and use of other psychoactive substances: psychotic disorder                           |
| A.2 | F19.6 | Mental and behavioural disorders due to multiple drug use and use of other psychoactive substances: amnesic disorder                             |
| A.2 | F19.7 | Mental and behavioural disorders due to multiple drug use and use of other psychoactive substances: residual and late-onset psychotic disorder   |
| A.2 | F19.8 | Mental and behavioural disorders due to multiple drug use and use of other psychoactive substances: other mental and behavioural disorders       |
| A.2 | F19.9 | Mental and behavioural disorders due to multiple drug use and use of other psychoactive substances: unspecified mental and behavioural disorders |
| A.2 | F52   | Sexual dysfunction, not caused by organic disorder or disease                                                                                    |
| A.2 | G21.2 | Secondary parkinsonism due to other external agents                                                                                              |
| A.2 | I42.7 | Cardiomyopathy due to drugs and other external agents                                                                                            |
| A.2 | L23.3 | Allergic contact dermatitis due to drugs in contact with skin                                                                                    |
| A.2 | L24.4 | Irritant contact dermatitis due to drugs in contact with skin                                                                                    |
| A.2 | L25.1 | Unspecified contact dermatitis due to drugs in contact with skin                                                                                 |
| A.2 | L27.0 | Generalized skin eruption due to drugs and medicaments                                                                                           |
| A.2 | L27.1 | Localized skin eruption due to drugs and medicaments                                                                                             |
| A.2 | L27.8 | Dermatitis due to other substances taken internally                                                                                              |
| A.2 | L27.9 | Dermatitis due to unspecified substance taken internally                                                                                         |
| A.2 | M34.2 | Systemic sclerosis induced by drugs and chemicals                                                                                                |
| A.2 | N14   | Drug- and heavy-metal-induced tubulo-interstitial and tubular conditions                                                                         |
| A.2 | N14.1 | Nephropathy induced by other drugs, medicaments and biological substances                                                                        |

|     |       |                                                                                                                                          |
|-----|-------|------------------------------------------------------------------------------------------------------------------------------------------|
| A.2 | N14.2 | Nephropathy induced by unspecified drug, medicament or biological substance                                                              |
| A.2 | N14.3 | Nephropathy induced by heavy metals                                                                                                      |
| A.2 | N14.4 | Toxic nephropathy, not elsewhere classified                                                                                              |
| A.2 | T78.2 | Anaphylactic shock, unspecified                                                                                                          |
| A.2 | T78.3 | Angioneurotic oedema                                                                                                                     |
| A.2 | T78.4 | Allergy, unspecified                                                                                                                     |
| A.2 | T78.8 | Other adverse effects, not elsewhere classified                                                                                          |
| A.2 | T78.9 | Adverse effect, unspecified                                                                                                              |
| A.2 | T80   | Complications following infusion, transfusion and therapeutic injection                                                                  |
| A.2 | T80.1 | Vascular complications following infusion, transfusion and therapeutic injection                                                         |
| A.2 | T80.2 | Infections following infusion, transfusion and therapeutic injection                                                                     |
| A.2 | T80.3 | ABO incompatibility reaction                                                                                                             |
| A.2 | T80.4 | Rh incompatibility reaction                                                                                                              |
| A.2 | T80.5 | Anaphylactic shock due to serum                                                                                                          |
| A.2 | T80.6 | Other serum reactions                                                                                                                    |
| A.2 | T80.8 | Other complications following infusion, transfusion and therapeutic injection                                                            |
| A.2 | T80.9 | Unspecified complication following infusion, transfusion and therapeutic injection                                                       |
| A.2 | T88.6 | Anaphylactic shock due to adverse effect of correct drug or medicament properly administered                                             |
| A.2 | T88.7 | Unspecified adverse effect of drug or medicament                                                                                         |
| A.2 | Y57   | Other and unspecified drugs and medicaments                                                                                              |
| A.2 | Y57.9 | Drug or medicament, unspecified                                                                                                          |
| A.2 | Y59   | Other and unspecified vaccines and biological substances                                                                                 |
| A.2 | Y59.9 | Vaccine or biological substance, unspecified                                                                                             |
| B.1 | T36   | Poisoning by systemic antibiotics                                                                                                        |
| B.1 | T36.0 | Poisoning by systemic antibiotics: Penicillin                                                                                            |
| B.1 | T36.1 | Poisoning by systemic antibiotics: Cephalosporins and other beta-lactam antibiotics                                                      |
| B.1 | T36.2 | Poisoning by systemic antibiotics: Chloramphenicol group                                                                                 |
| B.1 | T36.3 | Poisoning by systemic antibiotics: Marcolides                                                                                            |
| B.1 | T36.4 | Poisoning by systemic antibiotics: Tetracyclines                                                                                         |
| B.1 | T36.5 | Poisoning by systemic antibiotics: Aminoglycosides                                                                                       |
| B.1 | T36.6 | Poisoning by systemic antibiotics: Rifamycins                                                                                            |
| B.1 | T36.7 | Poisoning by systemic antibiotics: Antifungal antibiotics, systemically used                                                             |
| B.1 | T36.8 | Poisoning by systemic antibiotics: other systemic antibiotics                                                                            |
| B.1 | T36.9 | Poisoning by systemic antibiotics: systemic antibiotics, unspecified                                                                     |
| B.1 | T37   | Poisoning by other systemic anti-infectives and antiparasitics                                                                           |
| B.1 | T37.0 | Poisoning by other systemic anti-infectives and antiparasitics: Sulfonamides                                                             |
| B.1 | T37.1 | Poisoning by other systemic anti-infectives and antiparasitics: Antimycobacterial drugs                                                  |
| B.1 | T37.2 | Poisoning by other systemic anti-infectives and antiparasitics: Antimalarials and drugs acting on other blood protozoa                   |
| B.1 | T37.3 | Poisoning by other systemic anti-infectives and antiparasitics: Other antiprotozoal drugs                                                |
| B.1 | T37.4 | Poisoning by other systemic anti-infectives and antiparasitics: Anthelmintics                                                            |
| B.1 | T37.5 | Poisoning by other systemic anti-infectives and antiparasitics: Antiviral drugs                                                          |
| B.1 | T37.8 | Poisoning by other systemic anti-infectives and antiparasitics: Other specified systemic anti-infectives and antiparasitics              |
| B.1 | T37.9 | Poisoning by other systemic anti-infectives and antiparasitics: Systemic anti-infective and antiparasitics, unspecified                  |
| B.1 | T38   | Poisoning by hormones and their synthetic substitutes and antagonists, not elsewhere classified                                          |
| B.1 | T38.0 | Poisoning by hormones and their synthetic substitutes and antagonists, not elsewhere classified: Glucocorticoids and synthetic analogues |
| B.1 | T38.1 | Poisoning by hormones and their synthetic substitutes and antagonists, not elsewhere classified: Thyroid hormones and substitutes        |

|     |       |                                                                                                                                                                             |
|-----|-------|-----------------------------------------------------------------------------------------------------------------------------------------------------------------------------|
| B.1 | T38.2 | Poisoning by hormones and their synthetic substitutes and antagonists, not elsewhere classified: Antithyroid drugs                                                          |
| B.1 | T38.3 | Poisoning by hormones and their synthetic substitutes and antagonists, not elsewhere classified: Insulin and oral hypoglycaemic drugs                                       |
| B.1 | T38.4 | Poisoning by hormones and their synthetic substitutes and antagonists, not elsewhere classified: Oral contraceptives                                                        |
| B.1 | T38.5 | Poisoning by hormones and their synthetic substitutes and antagonists, not elsewhere classified: other estrogens and progestogens                                           |
| B.1 | T38.6 | Poisoning by hormones and their synthetic substitutes and antagonists, not elsewhere classified: Antigonadotrophins, antiestrogens, antiandrogens, not elsewhere classified |
| B.1 | T38.7 | Poisoning by hormones and their synthetic substitutes and antagonists, not elsewhere classified: Androgens and anabolic congeners                                           |
| B.1 | T38.8 | Poisoning by hormones and their synthetic substitutes and antagonists, not elsewhere classified: Other and unspecified hormones and their synthetic substitutes             |
| B.1 | T38.9 | Poisoning by hormones and their synthetic substitutes and antagonists, not elsewhere classified: other and unspecified hormone antagonists                                  |
| B.1 | T39   | Poisoning by nonopioid analgesics, antipyretics and antirheumatics                                                                                                          |
| B.1 | T39.0 | Poisoning by nonopioid analgesics, antipyretics and antirheumatics: Salicylates                                                                                             |
| B.1 | T39.1 | Poisoning by nonopioid analgesics, antipyretics and antirheumatics: 4-Aminophenol derivatives                                                                               |
| B.1 | T39.2 | Poisoning by nonopioid analgesics, antipyretics and antirheumatics: Pyrazolone derivatives                                                                                  |
| B.1 | T39.3 | Poisoning by nonopioid analgesics, antipyretics and antirheumatics: Other nonsteroidal anti-inflammatory drugs [NSAID]                                                      |
| B.1 | T39.4 | Poisoning by nonopioid analgesics, antipyretics and antirheumatics: Antirheumatics, not elsewhere classified                                                                |
| B.1 | T39.8 | Poisoning by nonopioid analgesics, antipyretics and antirheumatics: Other nonopioid analgesics and antipyretics, not elsewhere classified                                   |
| B.1 | T39.9 | Poisoning by nonopioid analgesics, antipyretics and antirheumatics: Nonopioid analgetic, antipyretic and antirheumatic, unspecified                                         |
| B.1 | T40   | Poisoning by narcotics and psychodysleptics [hallucinogens]                                                                                                                 |
| B.1 | T40.0 | Poisoning by narcotics and psychodysleptics [hallucinogens]: Opium                                                                                                          |
| B.1 | T40.1 | Poisoning by narcotics and psychodysleptics [hallucinogens]: Heroin                                                                                                         |
| B.1 | T40.2 | Poisoning by narcotics and psychodysleptics [hallucinogens]: Other opioids                                                                                                  |
| B.1 | T40.3 | Poisoning by narcotics and psychodysleptics [hallucinogens]: Methadone                                                                                                      |
| B.1 | T40.4 | Poisoning by narcotics and psychodysleptics [hallucinogens]: Other synthetic narcotics                                                                                      |
| B.1 | T40.5 | Poisoning by narcotics and psychodysleptics [hallucinogens]: Cocaine                                                                                                        |
| B.1 | T40.6 | Poisoning by narcotics and psychodysleptics [hallucinogens]: Other and unspecified narcotics                                                                                |
| B.1 | T40.7 | Poisoning by narcotics and psychodysleptics [hallucinogens]: Cannabis (derivates)                                                                                           |
| B.1 | T40.8 | Poisoning by narcotics and psychodysleptics [hallucinogens]: Lysergide (LSD)                                                                                                |
| B.1 | T40.9 | Poisoning by narcotics and psychodysleptics [hallucinogens]: Other and unspecified psychodysleptics [hallucinogens]                                                         |
| B.1 | T41   | Poisoning by anaesthetics and therapeutic gases                                                                                                                             |
| B.1 | T41.0 | Poisoning by anaesthetics and therapeutic gases: Inhaled anaesthetics                                                                                                       |
| B.1 | T41.1 | Poisoning by anaesthetics and therapeutic gases: Intravenous anaesthetics                                                                                                   |
| B.1 | T41.2 | Poisoning by anaesthetics and therapeutic gases: Other and unspecified general anaesthetics                                                                                 |
| B.1 | T41.3 | Poisoning by anaesthetics and therapeutic gases: Local Anaesthetics                                                                                                         |
| B.1 | T41.4 | Poisoning by anaesthetics and therapeutic gases: Anaesthetics, unspecified                                                                                                  |
| B.1 | T41.5 | Poisoning by anaesthetics and therapeutic gases: Therapeutic gases                                                                                                          |
| B.1 | T42   | Poisoning by antiepileptic, sedative-hypnotic and antiparkinsonism drugs                                                                                                    |
| B.1 | T42.0 | Poisoning by antiepileptic, sedative-hypnotic and antiparkinsonism drugs: Hydantoin derivatives                                                                             |
| B.1 | T42.1 | Poisoning by antiepileptic, sedative-hypnotic and antiparkinsonism drugs: Iminostilbenes                                                                                    |
| B.1 | T42.2 | Poisoning by antiepileptic, sedative-hypnotic and antiparkinsonism drugs: Succinimides and Oxazolinediones                                                                  |
| B.1 | T42.3 | Poisoning by antiepileptic, sedative-hypnotic and antiparkinsonism drugs: Barbiturates                                                                                      |
| B.1 | T42.4 | Poisoning by antiepileptic, sedative-hypnotic and antiparkinsonism drugs: Benzidiazepines                                                                                   |
| B.1 | T42.5 | Poisoning by antiepileptic, sedative-hypnotic and antiparkinsonism drugs: Mixed antiepileptics, not elsewhere classified                                                    |
| B.1 | T42.6 | Poisoning by antiepileptic, sedative-hypnotic and antiparkinsonism drugs: Other antiepileptic and sedative-hypnotic drugs                                                   |
| B.1 | T42.7 | Poisoning by antiepileptic, sedative-hypnotic and antiparkinsonism drugs: Antiepileptic and sedative-hypnotic drugs, unspecified                                            |

|     |       |                                                                                                                                                                                 |
|-----|-------|---------------------------------------------------------------------------------------------------------------------------------------------------------------------------------|
| B.1 | T42.8 | Poisoning by antiepileptic, sedative-hypnotic and antiparkinsonism drugs: Antiparkinsonism drugs and other central muscle-tone depressants                                      |
| B.1 | T43   | Poisoning by psychotropic drugs, not elsewhere classified                                                                                                                       |
| B.1 | T43.0 | Poisoning by psychotropic drugs, not elsewhere classified: Tricyclic and tetracyclic antidepressants                                                                            |
| B.1 | T43.1 | Poisoning by psychotropic drugs, not elsewhere classified: Monoamine-oxidase-inhibitor antidepressants                                                                          |
| B.1 | T43.2 | Poisoning by psychotropic drugs, not elsewhere classified: Other and unspecified antidepressants                                                                                |
| B.1 | T43.3 | Poisoning by psychotropic drugs, not elsewhere classified: Phenothiazine antipsychotics and neuroleptics                                                                        |
| B.1 | T43.4 | Poisoning by psychotropic drugs, not elsewhere classified: Butyrophenone and thioxanthene neuroleptics                                                                          |
| B.1 | T43.5 | Poisoning by psychotropic drugs, not elsewhere classified: Other and unspecified antipsychotics and neuroleptics                                                                |
| B.1 | T43.6 | Poisoning by psychotropic drugs, not elsewhere classified: Psychostimulants with abuse potential                                                                                |
| B.1 | T43.8 | Poisoning by psychotropic drugs, not elsewhere classified: Other psychotropic drugs, not elsewhere classified                                                                   |
| B.1 | T43.9 | Poisoning by psychotropic drugs, not elsewhere classified: Psychotropic drug, unspecified                                                                                       |
| B.1 | T44   | Poisoning by drugs primarily affecting the autonomic nervous system:                                                                                                            |
| B.1 | T44.0 | Poisoning by drugs primarily affecting the autonomic nervous system: Other parasympathomimetics [cholinergics]                                                                  |
| B.1 | T44.1 | Poisoning by drugs primarily affecting the autonomic nervous system: Other parasympathomimetics [cholinergics]                                                                  |
| B.1 | T44.2 | Poisoning by drugs primarily affecting the autonomic nervous system: Ganglionic blocking drugs, not elsewhere classified                                                        |
| B.1 | T44.3 | Poisoning by drugs primarily affecting the autonomic nervous system: Other parasympatholytics [anticholinergics and antimuscarinics] and spasmolytics, not elsewhere classified |
| B.1 | T44.4 | Poisoning by drugs primarily affecting the autonomic nervous system: Predominantly alpha-adrenoreceptor agonists, not elsewhere classified                                      |
| B.1 | T44.5 | Poisoning by drugs primarily affecting the autonomic nervous system: Predominantly beta-adrenoreceptor agonists, not elsewhere classified                                       |
| B.1 | T44.6 | Poisoning by drugs primarily affecting the autonomic nervous system: Alpha-adrenoreceptor antagonists, not elsewhere classified                                                 |
| B.1 | T44.7 | Poisoning by drugs primarily affecting the autonomic nervous system: Beta-adrenoreceptor antagonists, not elsewhere classified                                                  |
| B.1 | T44.8 | Poisoning by drugs primarily affecting the autonomic nervous system: Centrally acting and adrenergic-neuron-blocking agents, not elsewhere classified                           |
| B.1 | T44.9 | Poisoning by drugs primarily affecting the autonomic nervous system: Other and unspecified drugs primarily affecting the autonomic nervous system                               |
| B.1 | T45   | Poisoning by primarily systemic and haematological agents, not elsewhere classified                                                                                             |
| B.1 | T45.0 | Poisoning by primarily systemic and haematological agents, not elsewhere classified: Antiallergic and antiemetic drugs                                                          |
| B.1 | T45.1 | Poisoning by primarily systemic and haematological agents, not elsewhere classified: Antineoplastic and immunosuppressive drugs                                                 |
| B.1 | T45.2 | Poisoning by primarily systemic and haematological agents, not elsewhere classified: Vitamins, not elsewhere classified                                                         |
| B.1 | T45.3 | Poisoning by primarily systemic and haematological agents, not elsewhere classified: Enzymes, not elsewhere classified                                                          |
| B.1 | T45.4 | Poisoning by primarily systemic and haematological agents, not elsewhere classified: Iron and its compounds                                                                     |
| B.1 | T45.5 | Poisoning by primarily systemic and haematological agents, not elsewhere classified: Anticoagulants                                                                             |
| B.1 | T45.6 | Poisoning by primarily systemic and haematological agents, not elsewhere classified: Fibrinolysis-affecting drugs                                                               |
| B.1 | T45.7 | Poisoning by primarily systemic and haematological agents, not elsewhere classified: Anticoagulant antagonists, vitamin K and other coagulants                                  |
| B.1 | T45.8 | Poisoning by primarily systemic and haematological agents, not elsewhere classified: Other primarily systemic and haematological agents                                         |
| B.1 | T45.9 | Poisoning by primarily systemic and haematological agents, not elsewhere classified: Primarily systemic and haematological agent, unspecified                                   |
| B.1 | T46   | Poisoning by agents primarily affecting the cardiovascular system                                                                                                               |
| B.1 | T46.0 | Poisoning by agents primarily affecting the cardiovascular system: Cardiac-stimulant glycosides and drugs of similar action                                                     |
| B.1 | T46.1 | Poisoning by agents primarily affecting the cardiovascular system: Calcium-channel blockers                                                                                     |
| B.1 | T46.2 | Poisoning by agents primarily affecting the cardiovascular system: Other antidysrhythmic drugs, not elsewhere classified                                                        |
| B.1 | T46.3 | Poisoning by agents primarily affecting the cardiovascular system: Coronary vasodilators, not elsewhere classified                                                              |
| B.1 | T46.4 | Poisoning by agents primarily affecting the cardiovascular system: Angiotensin-converting-enzyme inhibitors                                                                     |
| B.1 | T46.5 | Poisoning by agents primarily affecting the cardiovascular system: Other antihypertensive drugs, not elsewhere classified                                                       |
| B.1 | T46.6 | Poisoning by agents primarily affecting the cardiovascular system: Antihyperlipidaemic and antiarteriosclerotic drugs                                                           |

|     |       |                                                                                                                                                                                                                                   |
|-----|-------|-----------------------------------------------------------------------------------------------------------------------------------------------------------------------------------------------------------------------------------|
| B.1 | T46.7 | Poisoning by agents primarily affecting the cardiovascular system: Peripheral vasodilators                                                                                                                                        |
| B.1 | T46.8 | Poisoning by agents primarily affecting the cardiovascular system: Antivaricose drugs, including sclerosing agents                                                                                                                |
| B.1 | T46.9 | Poisoning by agents primarily affecting the cardiovascular system: Other and unspecified agents primarily affecting the cardiovascular system                                                                                     |
| B.1 | T47   | Poisoning by agents primarily affecting the gastrointestinal system                                                                                                                                                               |
| B.1 | T47.0 | Poisoning by agents primarily affecting the gastrointestinal system: Histamine H2-receptor antagonists                                                                                                                            |
| B.1 | T47.1 | Poisoning by agents primarily affecting the gastrointestinal system: Other antacids and anti-gastric-secretion drugs                                                                                                              |
| B.1 | T47.2 | Poisoning by agents primarily affecting the gastrointestinal system: Stimulant laxatives                                                                                                                                          |
| B.1 | T47.3 | Poisoning by agents primarily affecting the gastrointestinal system: Saline and osmotic laxatives                                                                                                                                 |
| B.1 | T47.4 | Poisoning by agents primarily affecting the gastrointestinal system: Other laxatives                                                                                                                                              |
| B.1 | T47.5 | Poisoning by agents primarily affecting the gastrointestinal system: Digestants                                                                                                                                                   |
| B.1 | T47.6 | Poisoning by agents primarily affecting the gastrointestinal system: Antidiarrhoeal drugs                                                                                                                                         |
| B.1 | T47.7 | Poisoning by agents primarily affecting the gastrointestinal system: Emetics                                                                                                                                                      |
| B.1 | T47.8 | Poisoning by agents primarily affecting the gastrointestinal system: Other agents primarily affecting the gastrointestinal system                                                                                                 |
| B.1 | T47.9 | Poisoning by agents primarily affecting the gastrointestinal system: Agent primarily affecting the gastrointestinal system, unspecified                                                                                           |
| B.1 | T48   | Poisoning by agents primarily acting on smooth and skeletal muscles and the respiratory system                                                                                                                                    |
| B.1 | T48.0 | Poisoning by agents primarily acting on smooth and skeletal muscles and the respiratory system: Oxytocic drugs                                                                                                                    |
| B.1 | T48.1 | Poisoning by agents primarily acting on smooth and skeletal muscles and the respiratory system: Skeletal muscle relaxants [neuromuscular blocking agents]                                                                         |
| B.1 | T48.2 | Poisoning by agents primarily acting on smooth and skeletal muscles and the respiratory system: Other and unspecified agents primarily acting on muscle                                                                           |
| B.1 | T48.3 | Poisoning by agents primarily acting on smooth and skeletal muscles and the respiratory system: Antitussive                                                                                                                       |
| B.1 | T48.4 | Poisoning by agents primarily acting on smooth and skeletal muscles and the respiratory system: Expectorants                                                                                                                      |
| B.1 | T48.5 | Poisoning by agents primarily acting on smooth and skeletal muscles and the respiratory system: Anti-common-cold drugs                                                                                                            |
| B.1 | T48.6 | Poisoning by agents primarily acting on smooth and skeletal muscles and the respiratory system: Antiasthmatics, not elsewhere classified                                                                                          |
| B.1 | T48.7 | Poisoning by agents primarily acting on smooth and skeletal muscles and the respiratory system: Other and unspecified agents primarily acting on the respiratory system                                                           |
| B.1 | T49   | Poisoning by topical agents primarily affecting skin and mucous membrane and by ophthalmological, otorhinolaryngological and dental drugs                                                                                         |
| B.1 | T49.0 | Poisoning by topical agents primarily affecting skin and mucous membrane and by ophthalmological, otorhinolaryngological and dental drugs: Local antifungal, anti-infective and anti-inflammatory drugs, not elsewhere classified |
| B.1 | T49.1 | Poisoning by topical agents primarily affecting skin and mucous membrane and by ophthalmological, otorhinolaryngological and dental drugs: Antipruritics                                                                          |
| B.1 | T49.2 | Poisoning by topical agents primarily affecting skin and mucous membrane and by ophthalmological, otorhinolaryngological and dental drugs: Local astringents and local detergents                                                 |
| B.1 | T49.3 | Poisoning by topical agents primarily affecting skin and mucous membrane and by ophthalmological, otorhinolaryngological and dental drugs: Emollients, demulcents and protectants                                                 |
| B.1 | T49.4 | Poisoning by topical agents primarily affecting skin and mucous membrane and by ophthalmological, otorhinolaryngological and dental drugs: Keratolytics, keratoplastics and other hair treatment drugs and preparations           |
| B.1 | T49.5 | Poisoning by topical agents primarily affecting skin and mucous membrane and by ophthalmological, otorhinolaryngological and dental drugs: Ophthalmological drugs and preparations                                                |
| B.1 | T49.6 | Poisoning by topical agents primarily affecting skin and mucous membrane and by ophthalmological, otorhinolaryngological and dental drugs: Otorhinolaryngological drugs and preparations                                          |
| B.1 | T49.7 | Poisoning by topical agents primarily affecting skin and mucous membrane and by ophthalmological, otorhinolaryngological and dental drugs: Dental drugs, topically applied                                                        |
| B.1 | T49.8 | Poisoning by topical agents primarily affecting skin and mucous membrane and by ophthalmological, otorhinolaryngological and dental drugs: Other topical agents                                                                   |
| B.1 | T49.9 | Poisoning by topical agents primarily affecting skin and mucous membrane and by ophthalmological, otorhinolaryngological and dental drugs: Topical agent, unspecified                                                             |
| B.1 | T50   | Poisoning by diuretics and other and unspecified drugs, medicaments and biological substances                                                                                                                                     |
| B.1 | T50.0 | Poisoning by diuretics and other and unspecified drugs, medicaments and biological substances: Mineralocorticoids and their antagonists                                                                                           |
| B.1 | T50.1 | Poisoning by diuretics and other and unspecified drugs, medicaments and biological substances: Loop [high-ceiling] diuretics                                                                                                      |
| B.1 | T50.2 | Poisoning by diuretics and other and unspecified drugs, medicaments and biological substances: Carbonic-anhydrase inhibitors, benzothiadiazides and other diuretics                                                               |
| B.1 | T50.4 | Poisoning by diuretics and other and unspecified drugs, medicaments and biological substances: Drugs affecting uric acid metabolism                                                                                               |
| B.1 | T50.6 | Poisoning by diuretics and other and unspecified drugs, medicaments and biological substances: Antidotes and chelating agents, not elsewhere classified                                                                           |



|     |        |                                                                                                                                                                   |
|-----|--------|-------------------------------------------------------------------------------------------------------------------------------------------------------------------|
| B.1 | T50.7  | Poisoning by diuretics and other and unspecified drugs, medicaments and biological substances: Analeptics and opioid receptor antagonists                         |
| B.2 | F55    | Abuse of non-dependence-producing substances                                                                                                                      |
| B.2 | F55.0  | Abuse of non-dependence-producing substances: Antidepressants                                                                                                     |
| B.2 | F55.1  | Abuse of non-dependence-producing substances: Laxatives                                                                                                           |
| B.2 | F55.2  | Abuse of non-dependence-producing substances: Analgesics                                                                                                          |
| B.2 | F55.3  | Abuse of non-dependence-producing substances: Antacids                                                                                                            |
| B.2 | F55.4  | Abuse of non-dependence-producing substances: Vitamins                                                                                                            |
| B.2 | F55.5  | Abuse of non-dependence-producing substances: Steroids and hormones                                                                                               |
| B.2 | F55.6  | Abuse of non-dependence-producing substances: Herbal or folk remedies                                                                                             |
| B.2 | F55.8  | Abuse of non-dependence-producing substances, other non-dependence-producing substances                                                                           |
| B.2 | F55.9  | Abuse of non-dependence-producing substances: Unspecified                                                                                                         |
| B.2 | T50.3  | Poisoning by diuretics and other and unspecified drugs, medicaments and biological substances: Electrolytic, caloric and water-balance agents                     |
| B.2 | T50.5  | Poisoning by diuretics and other and unspecified drugs, medicaments and biological substances: Appetite depressants                                               |
| B.2 | T50.8  | Poisoning by diuretics and other and unspecified drugs, medicaments and biological substances: Diagnostic agents                                                  |
| B.2 | T50.9  | Poisoning by diuretics and other and unspecified drugs, medicaments and biological substances: Other and unspecified drugs, medicaments and biological substances |
| B.2 | T96    | Sequelae of poisoning by drugs, medicaments and biological substances                                                                                             |
| C   | A04.7  | Enterocolitis due to <i>Clostridium difficile</i>                                                                                                                 |
| C   | D69.0  | Allergic purpura                                                                                                                                                  |
| C   | D69.2  | Other nonthrombocytopenic purpura                                                                                                                                 |
| C   | D69.5  | Secondary thrombocytopenia                                                                                                                                        |
| C   | D69.57 | Secondary thrombocytopenia, refractory to transfusions                                                                                                            |
| C   | D69.58 | Secondary thrombocytopenia, not refractory to transfusions                                                                                                        |
| C   | D69.59 | Secondary thrombocytopenia, unspecified                                                                                                                           |
| C   | E15    | Nondiabetic hypoglycaemic coma                                                                                                                                    |
| C   | H91.0  | Ototoxic hearing loss                                                                                                                                             |
| C   | K52.1  | Toxic gastroenteritis and colitis                                                                                                                                 |
| C   | K71    | Toxic liver disease                                                                                                                                               |
| C   | K71.0  | Toxic liver disease with cholestasis                                                                                                                              |
| C   | K71.1  | Toxic liver disease with hepatic necrosis                                                                                                                         |
| C   | K71.2  | Toxic liver disease with acute hepatitis                                                                                                                          |
| C   | K71.3  | Toxic liver disease with chronic persistent hepatitis                                                                                                             |
| C   | K71.4  | Toxic liver disease with chronic lobular hepatitis                                                                                                                |
| C   | K71.5  | Toxic liver disease with chronic active hepatitis                                                                                                                 |
| C   | K71.6  | Toxic liver disease with hepatitis, not elsewhere classified                                                                                                      |
| C   | K71.7  | Toxic liver disease with fibrosis and cirrhosis of liver                                                                                                          |
| C   | K71.8  | Toxic liver disease with other disorders of liver                                                                                                                 |
| C   | K71.9  | Toxic liver disease, unspecified                                                                                                                                  |
| C   | L51    | Erythema multiforme                                                                                                                                               |
| C   | L51.0  | Nonbullous erythema multiforme                                                                                                                                    |
| C   | L51.1  | Bullous erythema multiforme                                                                                                                                       |
| C   | L51.2  | Toxic epidermal necrolysis [Lyell]                                                                                                                                |
| C   | L51.20 | Toxic epidermal necrolysis, Infestation of less than 30 % of the body surface                                                                                     |
| C   | L51.21 | Toxic epidermal necrolysis, Infestation of 30 % of the body surface                                                                                               |
| C   | L51.8  | Other erythema multiforme                                                                                                                                         |
| C   | L51.9  | Erythema multiforme, unspecified                                                                                                                                  |
| C   | L56.2  | Photocontact dermatitis                                                                                                                                           |

|   |       |                                                                                                     |
|---|-------|-----------------------------------------------------------------------------------------------------|
| C | N99.0 | Postprocedural renal failure                                                                        |
| C | O74.2 | Cardiac complications of anaesthesia during labour and delivery                                     |
| C | O74.3 | Central nervous system complications of anaesthesia during labour and delivery                      |
| C | Y69   | Unspecified misadventure during surgical and medical care                                           |
| D | K25   | Gastric ulcer                                                                                       |
| D | K25.0 | Gastric ulcer: Acute with haemorrhage                                                               |
| D | K25.1 | Gastric ulcer: Acute with perforation                                                               |
| D | K25.2 | Gastric ulcer: Acute with both haemorrhage and perforation                                          |
| D | K25.3 | Gastric ulcer: Acute without haemorrhage or perforation                                             |
| D | K25.4 | Gastric ulcer: Chronic or unspecified with haemorrhage                                              |
| D | K25.5 | Gastric ulcer: Chronic or unspecified with perforation                                              |
| D | K25.6 | Gastric ulcer: Chronic or unspecified with both haemorrhage and perforation                         |
| D | K25.7 | Gastric ulcer: Chronic without haemorrhage or perforation                                           |
| D | K25.9 | Gastric ulcer: Unspecified as acute or chronic, without haemorrhage or perforation                  |
| D | K26   | Duodenal ulcer                                                                                      |
| D | K26.0 | Duodenal ulcer: Acute with haemorrhage                                                              |
| D | K26.1 | Duodenal ulcer: Acute with perforation                                                              |
| D | K26.2 | Duodenal ulcer: Acute with both haemorrhage and perforation                                         |
| D | K26.3 | Duodenal ulcer: Acute without haemorrhage or perforation                                            |
| D | K26.4 | Duodenal ulcer: Chronic or unspecified with haemorrhage                                             |
| D | K26.5 | Duodenal ulcer: Chronic or unspecified with perforation                                             |
| D | K26.6 | Duodenal ulcer: Chronic or unspecified with both haemorrhage and perforation                        |
| D | K26.7 | Duodenal ulcer: Chronic without haemorrhage or perforation                                          |
| D | K26.9 | Duodenal ulcer: Unspecified as acute or chronic, without haemorrhage or perforation                 |
| D | K27   | Peptic ulcer, site unspecified                                                                      |
| D | K27.0 | Peptic ulcer, site unspecified: Acute with haemorrhage                                              |
| D | K27.1 | Peptic ulcer, site unspecified: Acute with perforation                                              |
| D | K27.2 | Peptic ulcer, site unspecified: Acute with both haemorrhage and perforation                         |
| D | K27.3 | Peptic ulcer, site unspecified: Acute without haemorrhage or perforation                            |
| D | K27.4 | Peptic ulcer, site unspecified: Chronic or unspecified with haemorrhage                             |
| D | K27.5 | Peptic ulcer, site unspecified: Chronic or unspecified with perforation                             |
| D | K27.6 | Peptic ulcer, site unspecified: Chronic or unspecified with both haemorrhage and perforation        |
| D | K27.7 | Peptic ulcer, site unspecified: Chronic without haemorrhage or perforation                          |
| D | K27.9 | Peptic ulcer, site unspecified: Unspecified as acute or chronic, without haemorrhage or perforation |
| D | K28   | Gastrojejunal ulcer                                                                                 |
| D | K28.0 | Gastrojejunal ulcer: Acute with haemorrhage                                                         |
| D | K28.1 | Gastrojejunal ulcer: Acute with perforation                                                         |
| D | K28.2 | Gastrojejunal ulcer: Acute with both haemorrhage and perforation                                    |
| D | K28.3 | Gastrojejunal ulcer: Acute without haemorrhage or perforation                                       |
| D | K28.4 | Gastrojejunal ulcer: Chronic or unspecified with haemorrhage                                        |
| D | K28.5 | Gastrojejunal ulcer: Chronic or unspecified with perforation                                        |
| D | K28.6 | Gastrojejunal ulcer: Chronic or unspecified with both haemorrhage and perforation                   |
| D | K28.7 | Gastrojejunal ulcer: Chronic without haemorrhage or perforation                                     |
| D | K28.9 | Gastrojejunal ulcer: Unspecified as acute or chronic, without haemorrhage or perforation            |
| D | K29.0 | Gastritis and duodenitis                                                                            |
| D | L50.0 | Allergic urticaria                                                                                  |
| D | N17   | Acute renal failure                                                                                 |

|   |       |                                                        |
|---|-------|--------------------------------------------------------|
| D | N17.0 | Acute renal failure with tubular necrosis              |
| D | N17.1 | Acute renal failure with acute cortical necrosis       |
| D | N17.2 | Acute renal failure with medullary necrosis            |
| D | N17.8 | Other acute renal failure                              |
| D | N17.9 | Acute renal failure, unspecified                       |
| E | I26.0 | Pulmonary embolism with mention of acute cor pulmonale |
| E | I61.0 | Intracerebral haemorrhage in hemisphere, subcortical   |
| E | I61.1 | Intracerebral haemorrhage in hemisphere, cortical      |
| E | I61.2 | Intracerebral haemorrhage in hemisphere, unspecified   |
| E | I61.3 | Intracerebral haemorrhage in brain stem                |
| E | I61.4 | Intracerebral haemorrhage in cerebellum                |
| E | I61.5 | Intracerebral haemorrhage, intraventricular            |
| E | I61.6 | Intracerebral haemorrhage, multiple localized          |
| E | I61.8 | Other intracerebral haemorrhage                        |
| E | I61.9 | Intracerebral haemorrhage, unspecified                 |
| E | J45.0 | Predominantly allergic asthma                          |
| E | K72.0 | Acute and subacute hepatic failure                     |
| E | K92.2 | Gastrointestinal haemorrhage, unspecified              |
